# Supplementary material
Source: PubMed Central journal article supplement (PMC5392370)

A

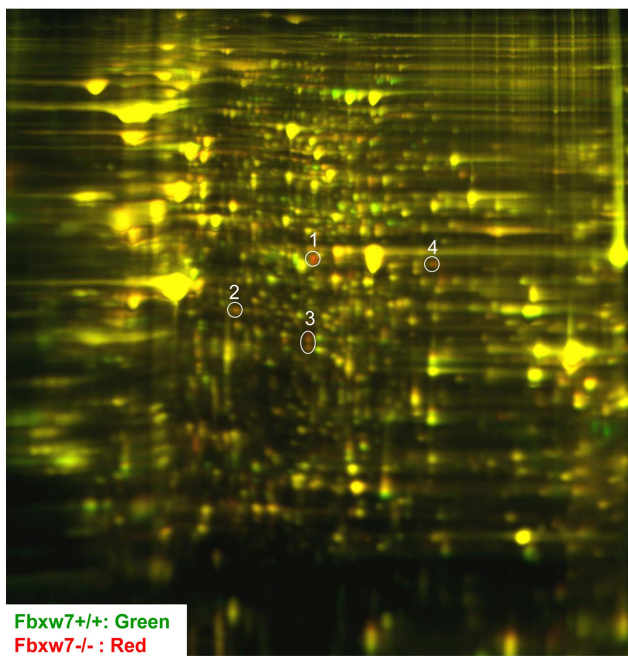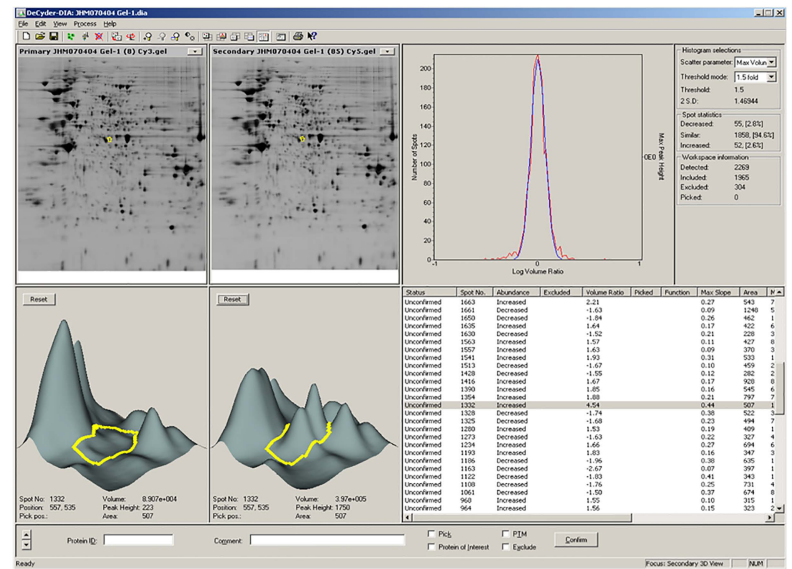

B

| Spots | Identified genes               |
|-------|--------------------------------|
| 1     | EBP1(PA2G4)<br>ENO1            |
| 2     | GSTP1<br>GRB2(ASH)             |
| 3     | SERPINB5<br>C12orf10<br>Fusip1 |
| 4     | GALE<br>Hng<br>GAPD            |

C

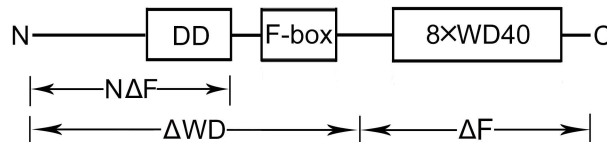

D

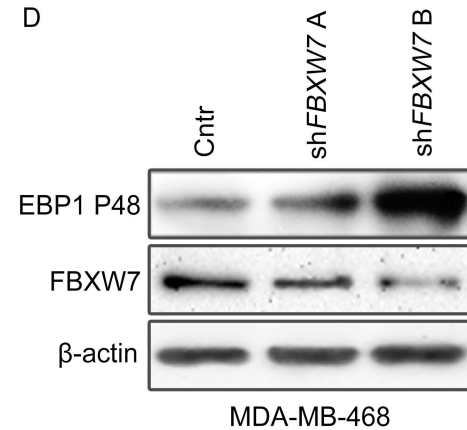

E

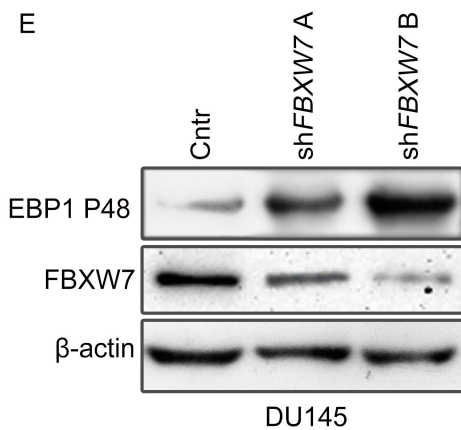

F

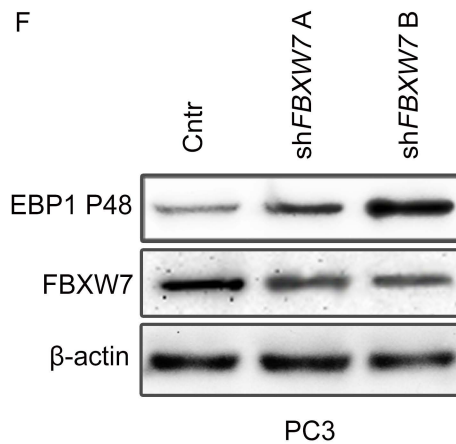

G

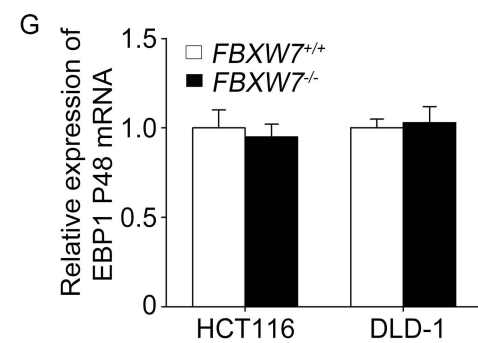

H

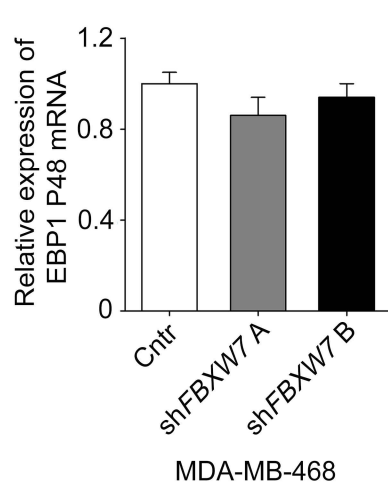

I

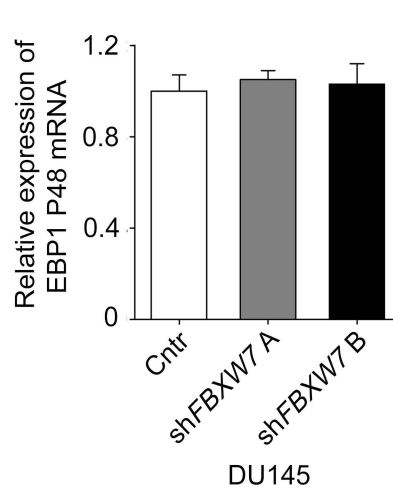

J

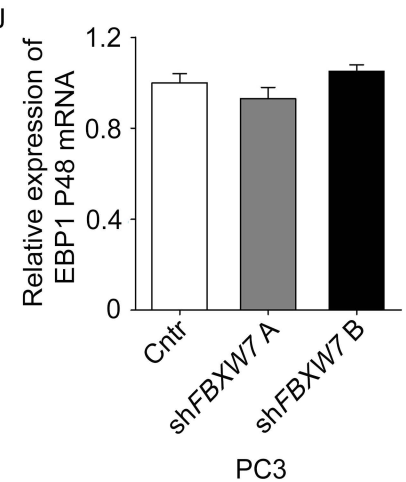

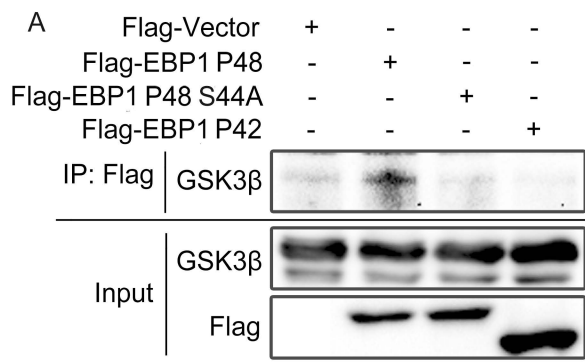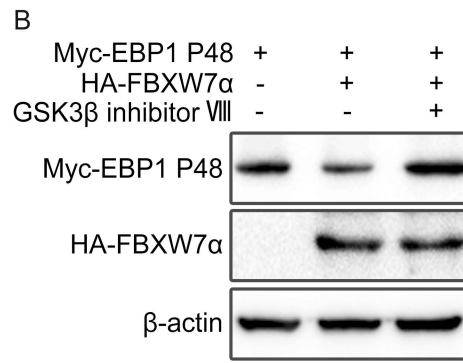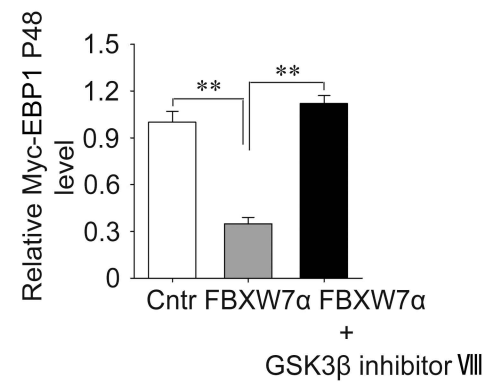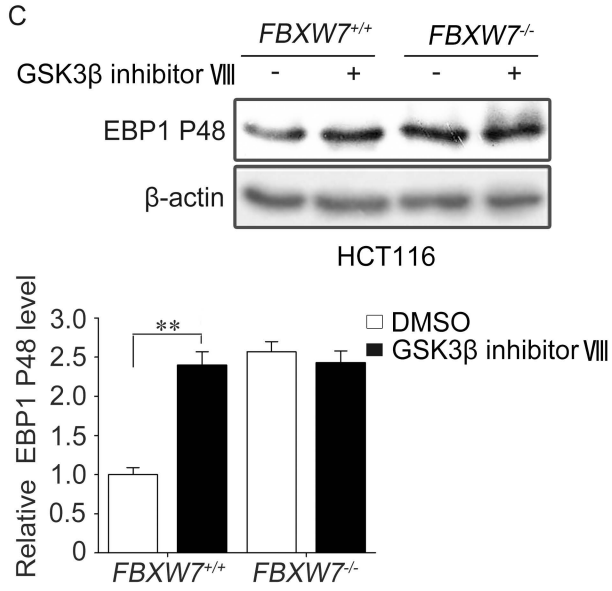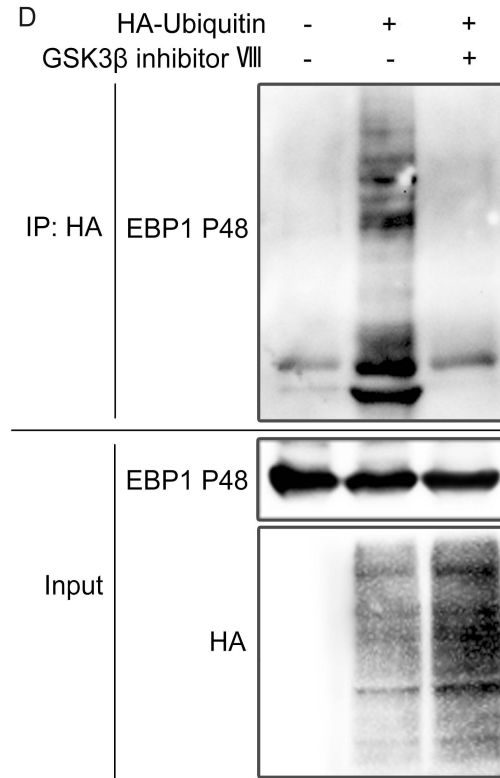

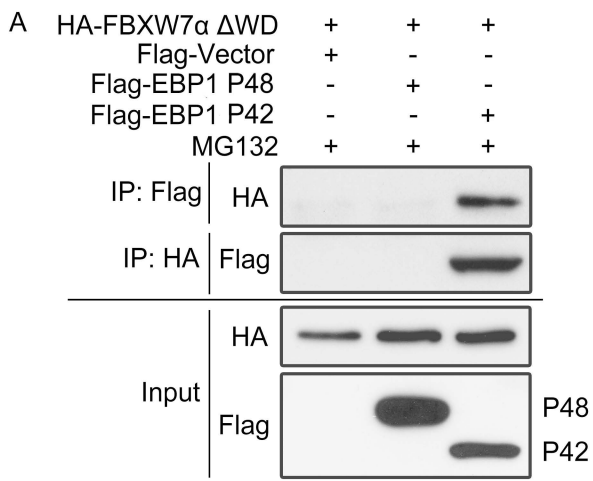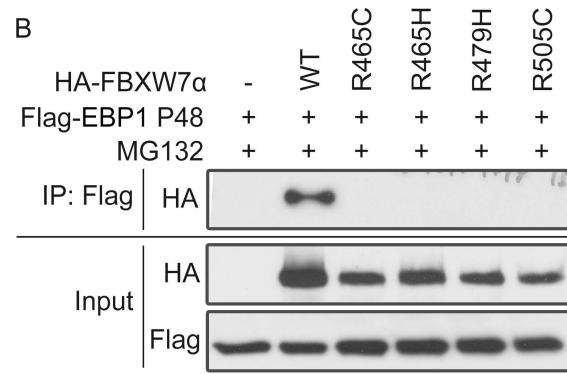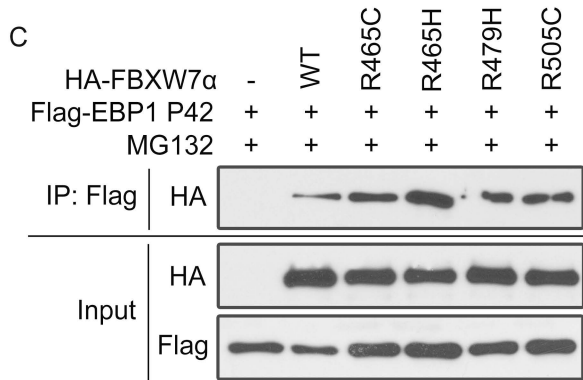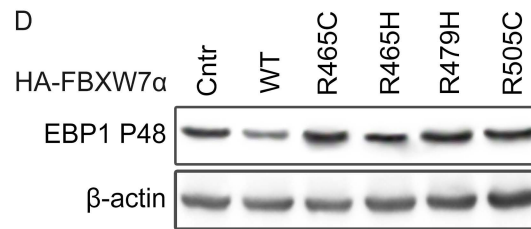

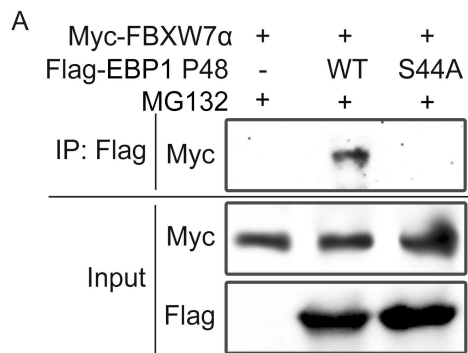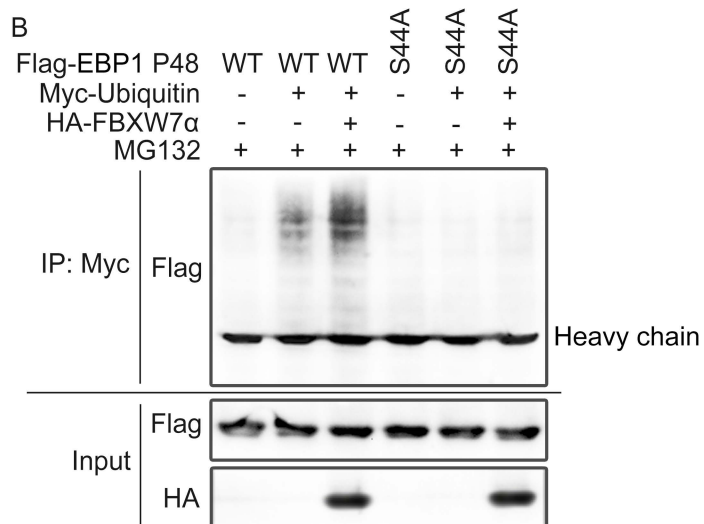

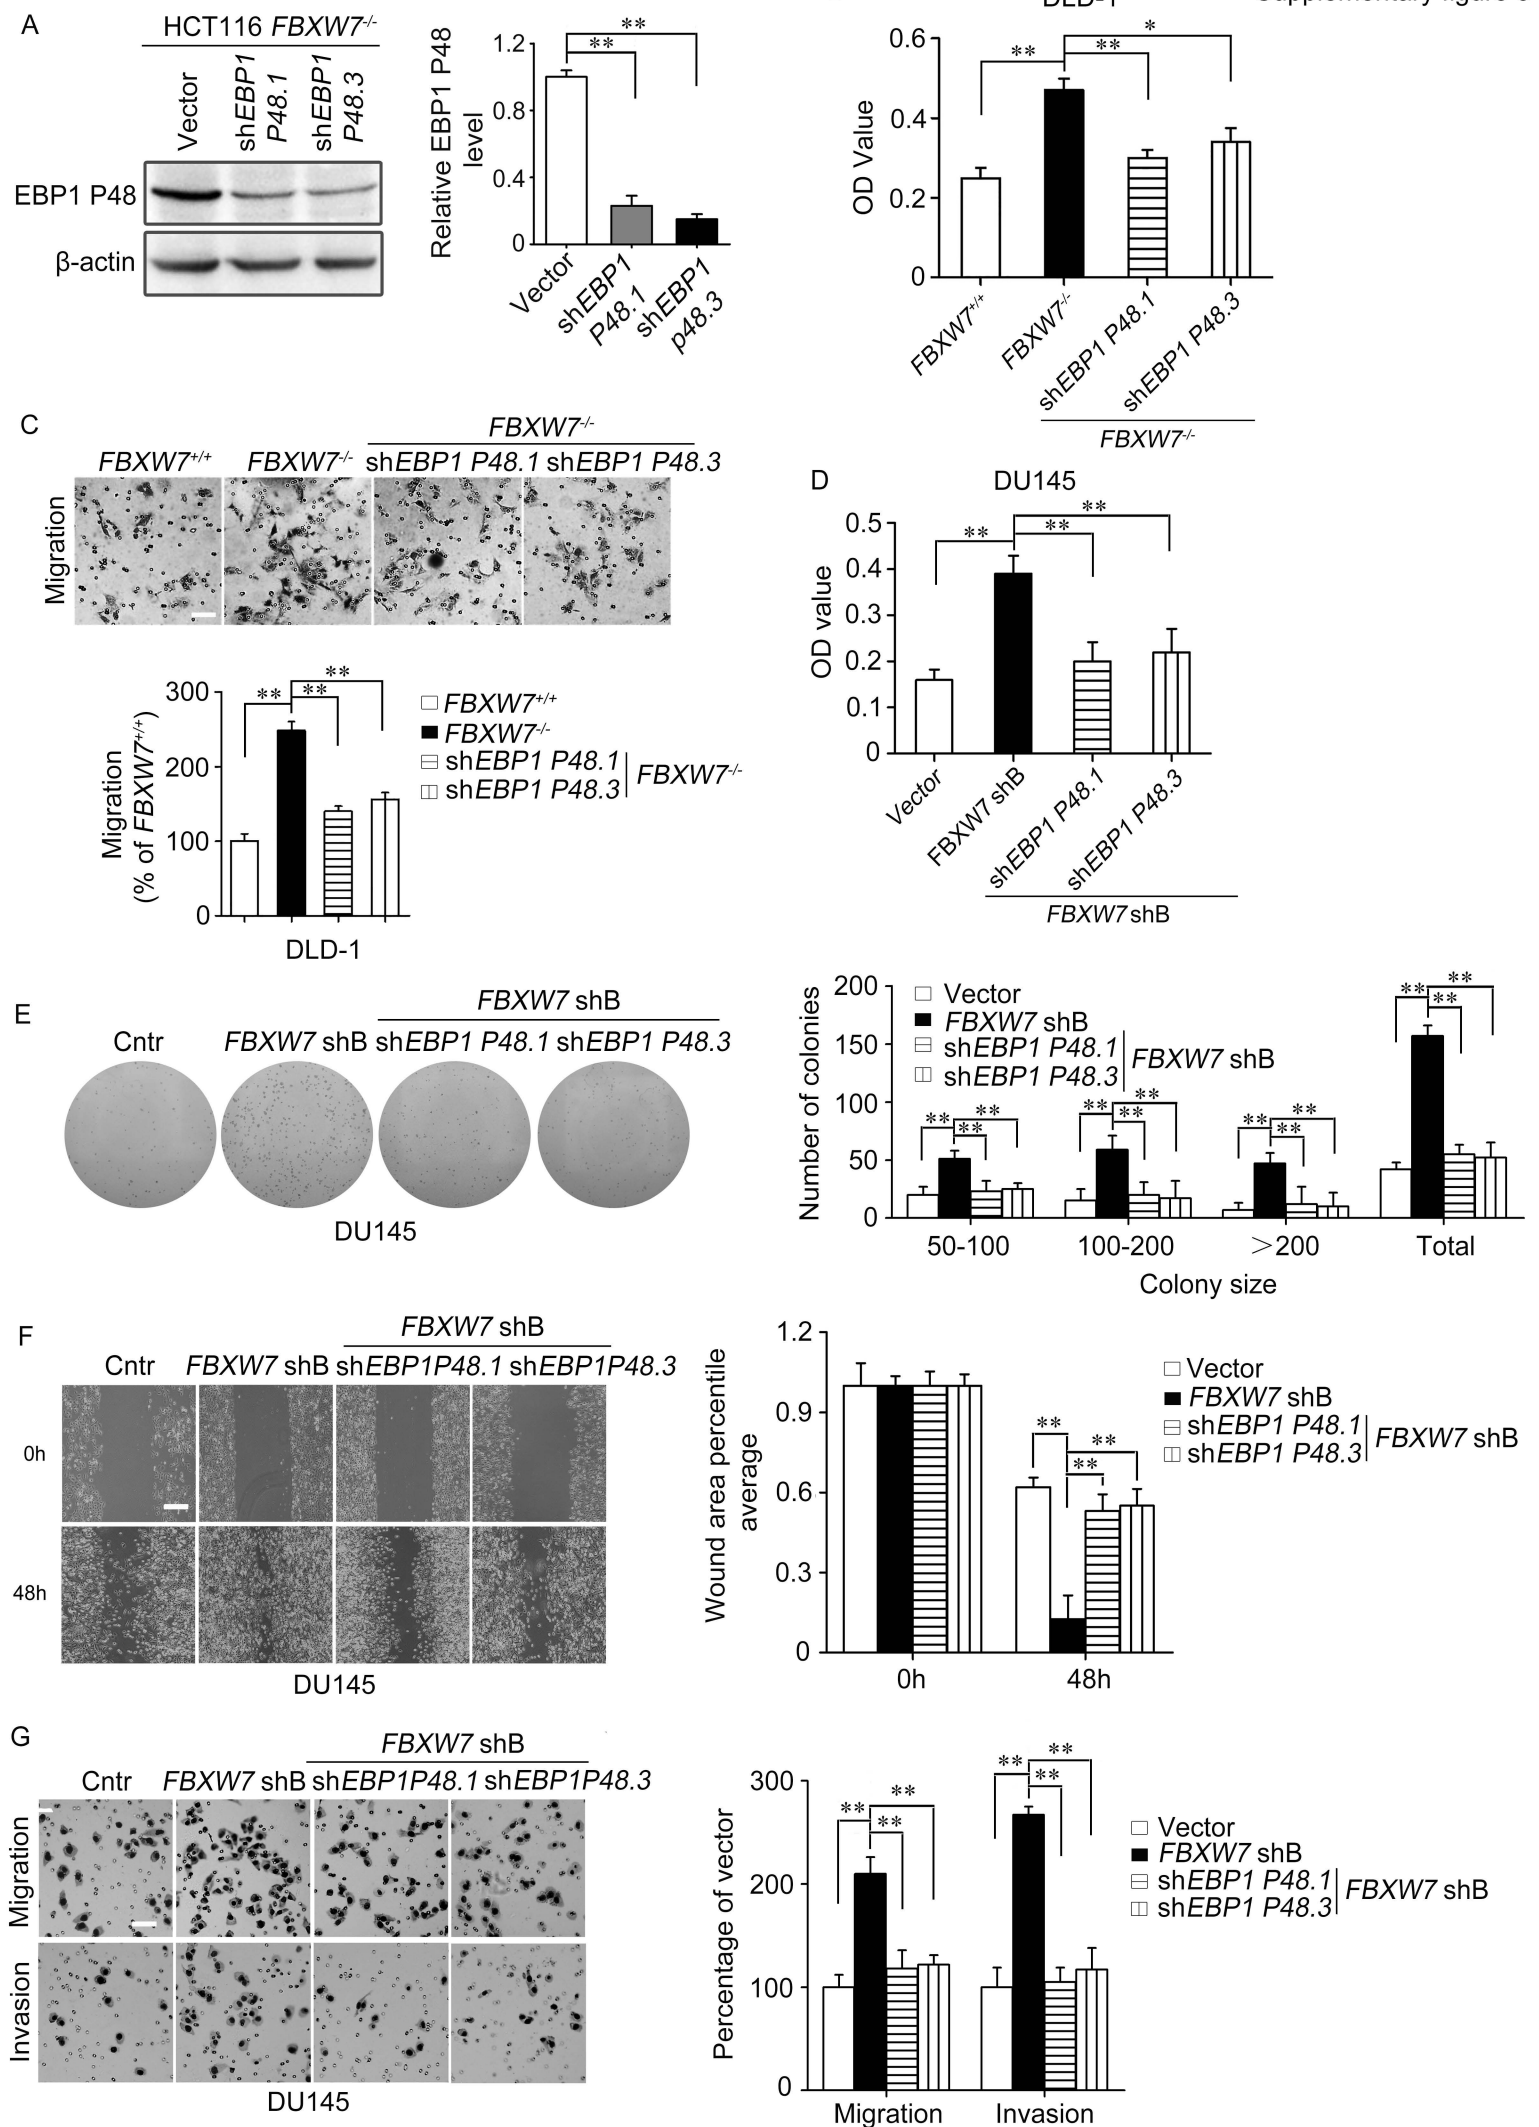

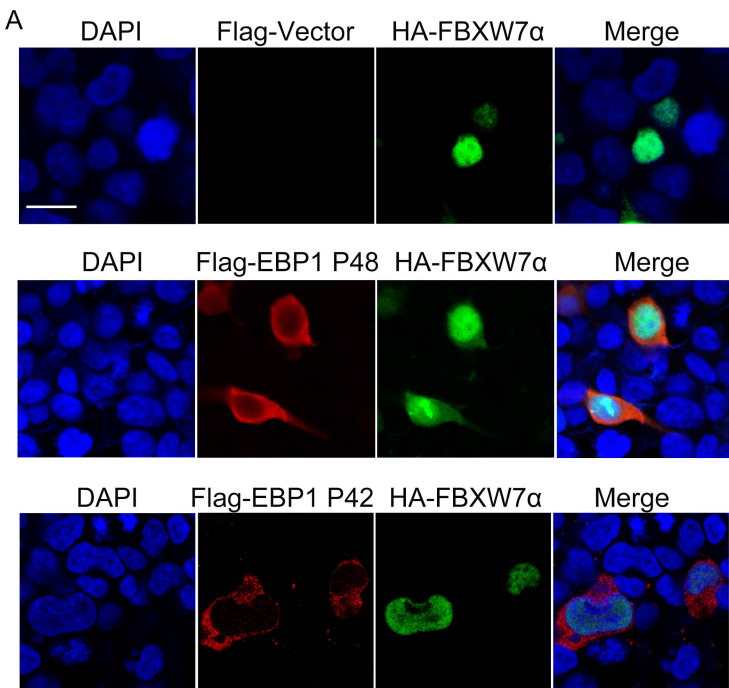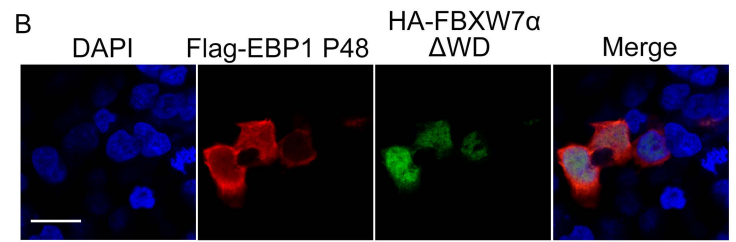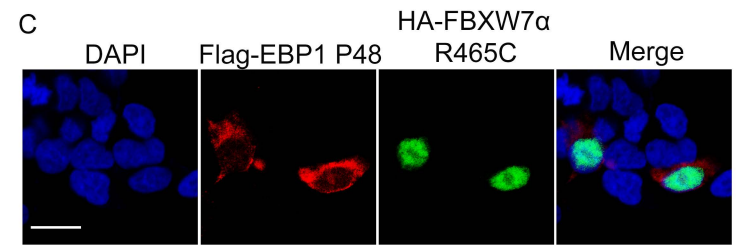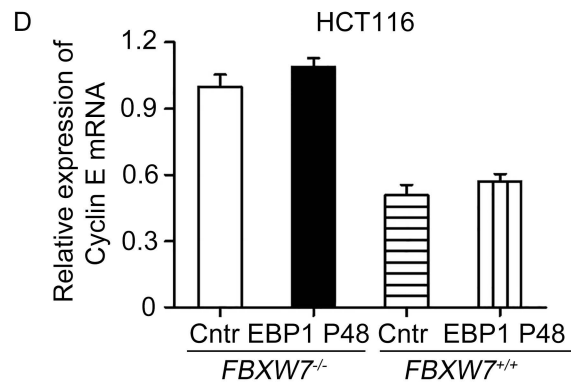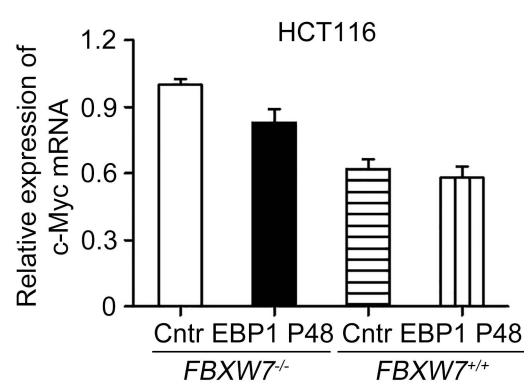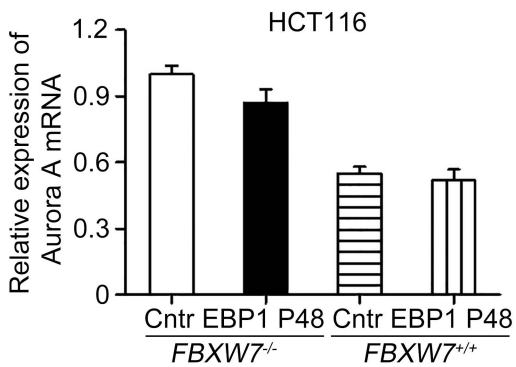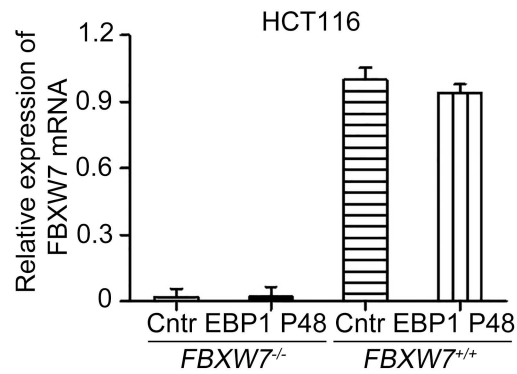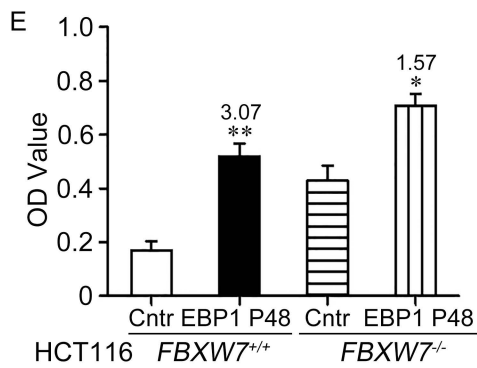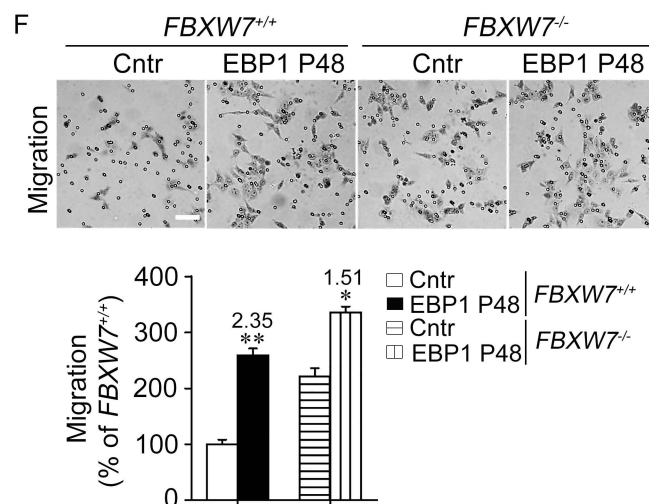

A

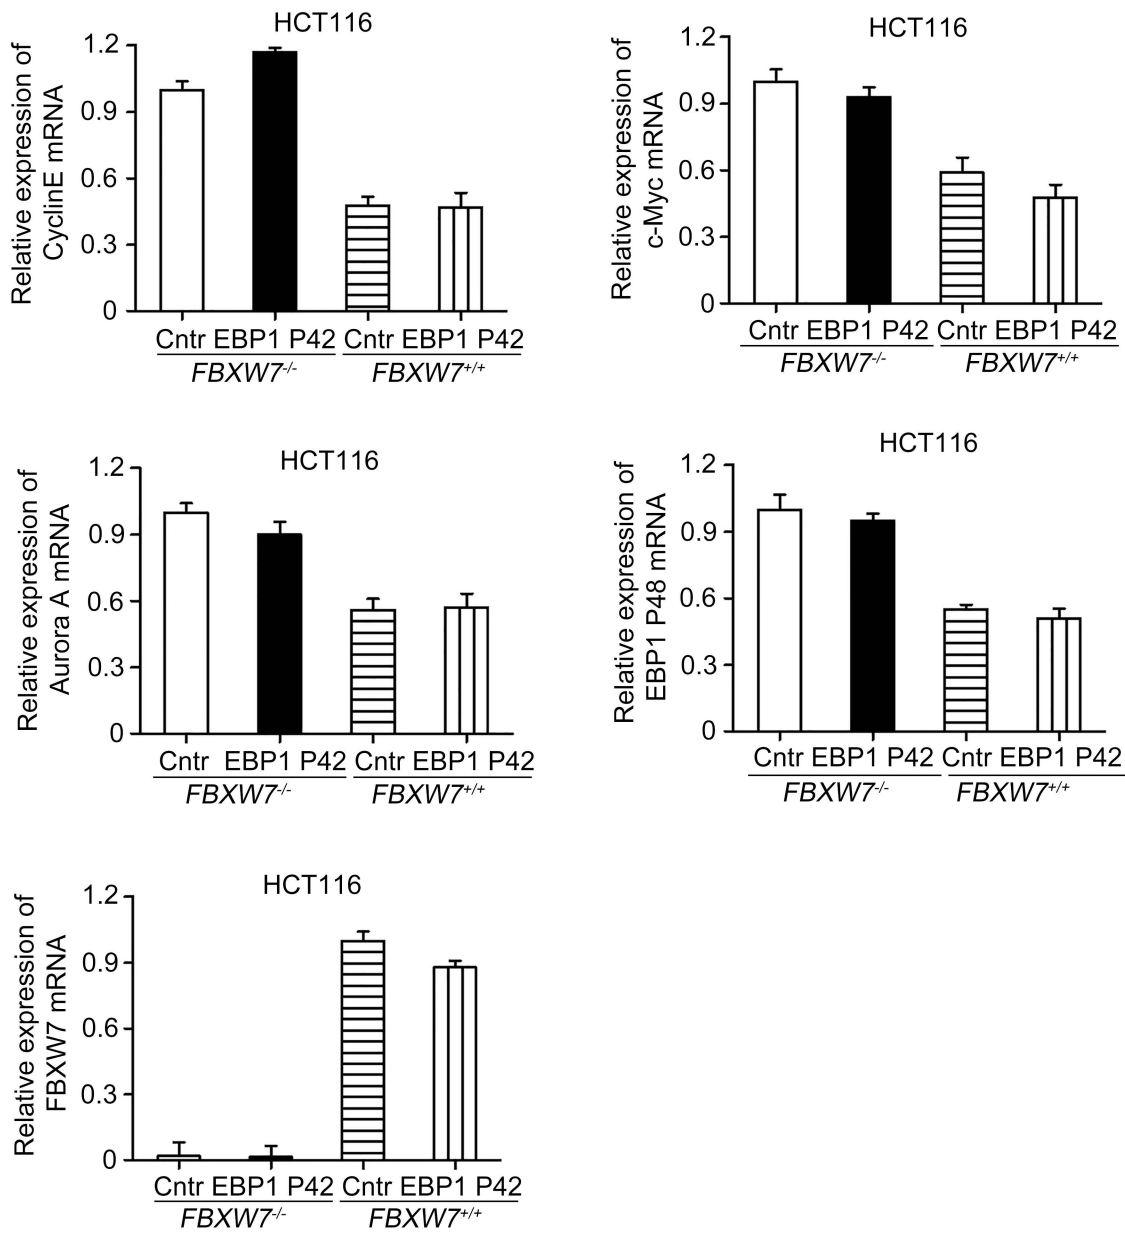

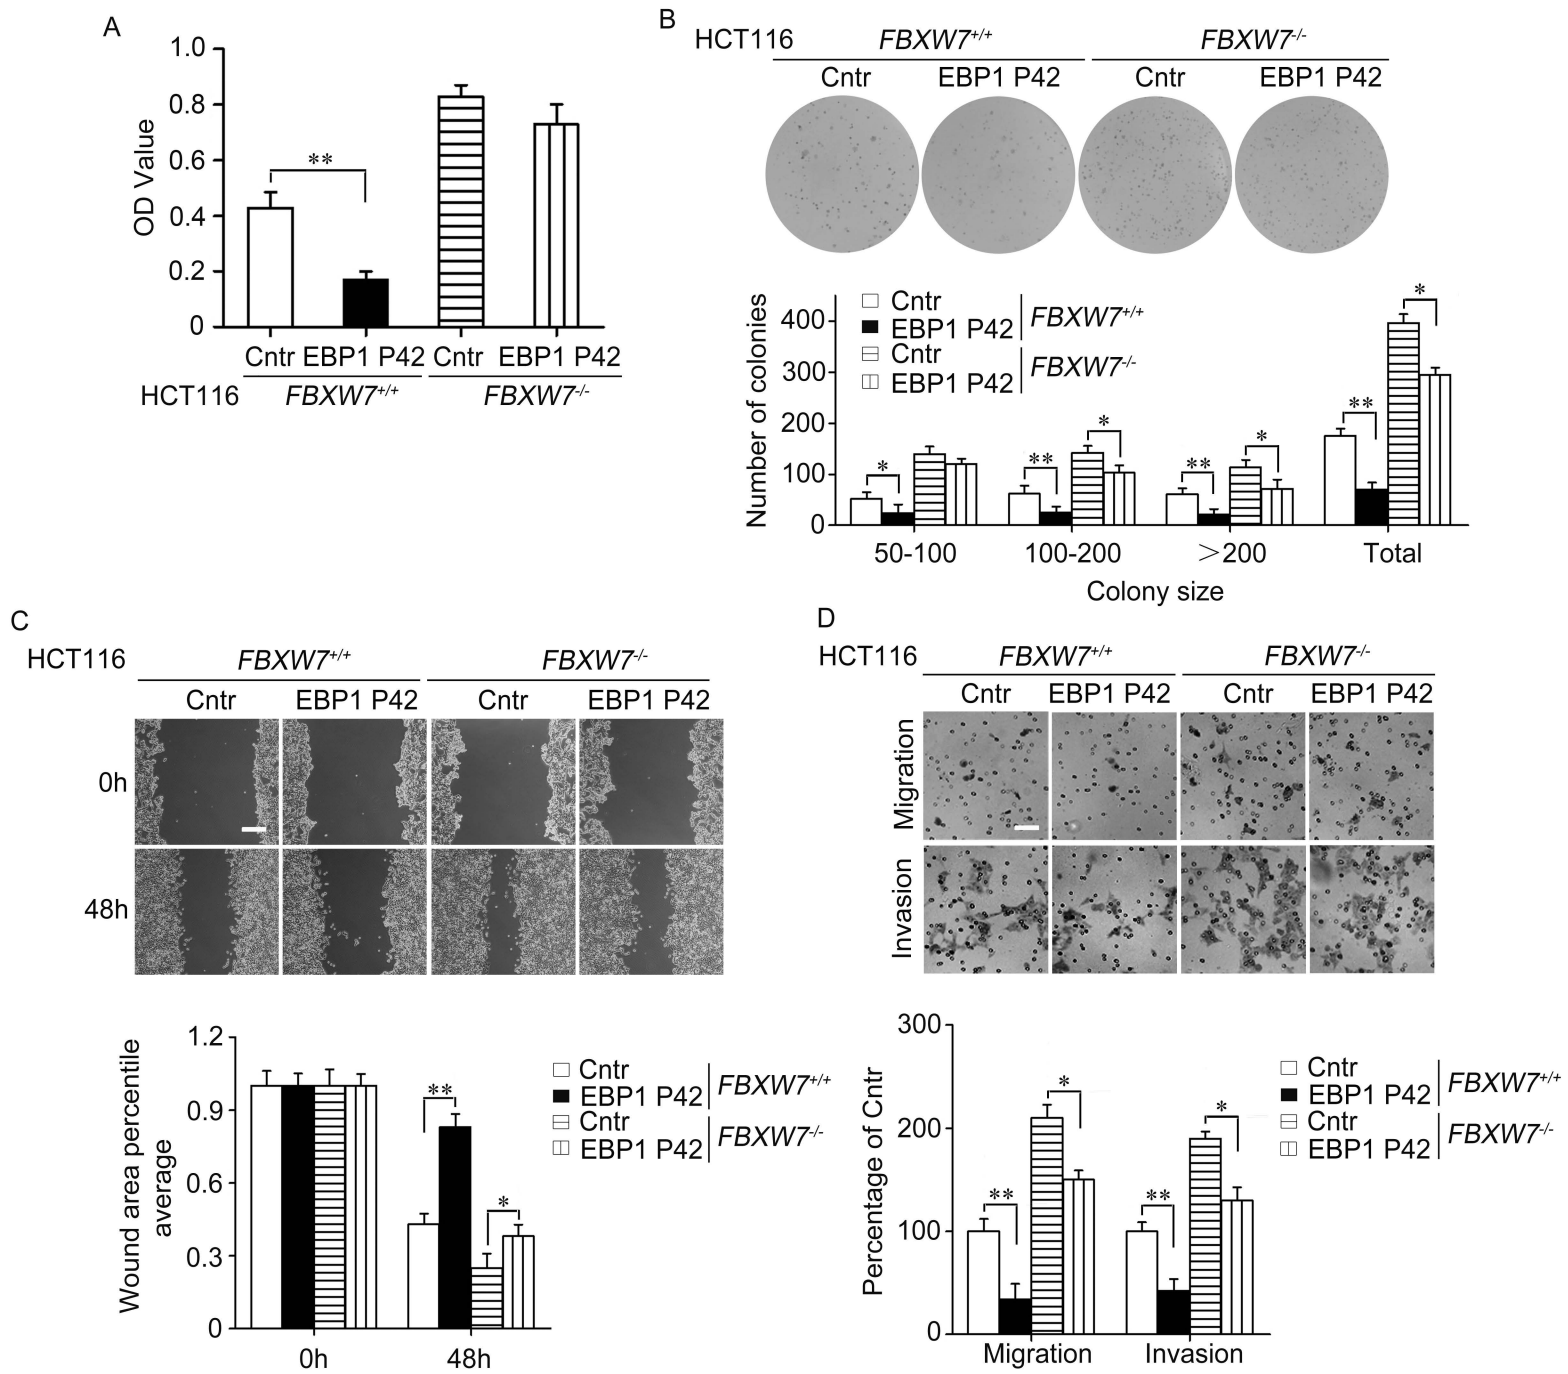

Supplement: NIHMS851800-supplement-1.pdf [file NIHMS851800-supplement-1.pdf]
